# Supplementary material
Source: Frontiers journal article supplement (https://www.frontiersin.org/articles/263097)
Supplement: Table_1.DOC [file Table_1.DOC]

Supplementary Material

# Article Title

**Why conferences matter – an illustration from the International Marine Conservation Congress**

**S. Oester*, J.A. Cigliano, E.J. Hind-Ozan, E.C.M. Parsons**

*** Correspondence:** S. Oester: Samantha.oester@gmail.com

# Tables

**Table 1.** An online survey was distributed to delegates of the 3rd International Marine Conservation Congress (IMCC3) and respondents indicated the following benefits of the conference (n=100; ~13% response rate; 95% confidence interval +/- 9.16%).

| **As a result of going to the International Marine Conservation Congress, did you gain any useful new information that will aid (n=99):** | |
| --- | --- |
| Your research | 57.6% |
| In-the-field conservation | 29.3% |
| Conservation communication (e.g. blogs, classes, etc.) | 45.5% |
| Conservation management/policy making | 47.5% |
| **As a result of going to the International Marine Conservation Congress, did you gain a new technique or technology that will aid (n=98):** | |
| Your research | 25.5% |
| In-the-field conservation | 13.7% |
| Conservation communication (e.g. blogs, classes, etc.) | 33.7% |
| Conservation management/policy making | 16.3% |
| **As a result of going to the International Marine Conservation Congress, did you gain new skills that will aid (n=96):** | |
| Your research | 29.2% |
| In-the-field conservation | 15.6% |
| Conservation communication (e.g. blogs, classes, etc.) | 44.8% |
| Conservation management/policy making | 21.9% |
| **As a result of going to the International Marine Conservation Congress, did you gain an idea for novel (n=96):** | |
| Research | 42.7% |
| In-the-field conservation | 13.5% |
| Conservation communication (e.g. blogs, classes, etc.) | 33.3% |
| Conservation management/policy making | 27.1% |
| **As a result of going to the International Marine Conservation Congress, did you meet a person and/or contact that may lead to: (n=97):** | |
| Research | 65.0% |
| In-the-field conservation | 37.1% |
| Conservation communication (e.g. blogs, classes, etc.) | 49.5% |
| Conservation management/policy making | 45.4% |
| **As a result of going to the International Marine Conservation Congress, did you gain any of the following that may lead to a new publication: (n=97):** | |
| Idea(s) | 38.1% |
| New contact(s) | 41.2% |
| Lesson(s) from a workshop/symposium | 32.0% |
| **As a result of going to the International Marine Conservation Congress, did you gain any of the following that may lead to a new grant proposal: (n=97):** | |
| Idea(s) | 25.3% |
| New contact(s) | 21.2% |
| Lesson(s) from a workshop/symposium | 9.1% |
| **As a result of going to the International Marine Conservation Congress, did you meet a person or representative of an organization that may lead to funding for: (n=97):** | |
| Your research | 24.7% |
| In-the-field conservation | 11.3% |
| Conservation communication (e.g. blogs, classes, etc.) | 8.3% |
| Conservation management/policy making | 9.3% |

**Table 2.** An online survey was distributed to delegates of the 4th International Marine Conservation Congress (IMCC4) and respondents indicated the following benefits of the conference (n=83; ~13% response rate).

| **Tell us about what you achieved at this meeting (check all that apply) (n=83):** | |
| --- | --- |
| I was inspired to pursue a new avenue of research or conservation work | 24.1% |
| I learned about a new approach or technique that I plan to use in my work | 39.8% |
| I reestablished old professional contacts | 41.0% |
| I established new professional contacts in my area of interest | 89.2% |
| I established a working relationship with someone in my country | 24.1% |
| I established a working relationship with someone outside my country | 31.3% |

**Table 3.** Some suggestions for maximizing the benefits of conference attendance.

| **Suggestions** |
| --- |
| Make note of, attend, and speak up during focus group-style sessions. Because they're discussion-based, they can lead to future collaborations and opportunities. |
| Make business cards that highlight you areas of expertise and summarize experience, as well as list contact information. This aids conference networking, and in many cases, business cards can be printed very affordably. Treat them like a very concise, brief CV, especially if you are a student. |
| Volunteer as a conference assistant. You will meet fellow delegates this way who you can network with, again opening up future opportunities. Even if incentivized volunteer positions fill up, still express your interest in helping out and follow through. |
| Encourage follow-up on ideas discussed at the conference. Every group needs someone to kick start things. |
| Attend conference social events. |
| Take notes. Many papers published in conference proceedings are facilitated more easily (and more likely to be written) if someone took excellent notes at appropriate times during the conference. |
| Finish preparing your talk/poster before the conference, so you can focus on fuller participation in other aspects of the conference while you are in attendance. |
